# Supplementary material for: Simultaneous measurement of contractile force and field potential of dynamically beating human iPS cell-derived cardiac cell sheet-tissue with flexible electronics
Source: Royal Society of Chemistry journal article supplement (doi:10.1039/d1lc00411e), 2021-01-01
Supplement: d1lc00411e4.pdf [file d1lc00411e4.pdf]

## Supporting Information

### Simultaneous Measurement of Contractile Force and Field Potential of Dynamically Beating Human iPS Cell-Derived Cardiac Cell Sheet-Tissue with Flexible Electronics

Takashi Ohya,<sup>a,d</sup> Haruki Ohtomo,<sup>a</sup> Tetsutaro Kikuchi,<sup>b</sup> Daisuke Sasaki,<sup>b</sup> Yohei Kawamura,<sup>c,d</sup> Katsuhisa Matsuura,<sup>b</sup> Tatsuya Shimizu,<sup>b</sup> Kenjiro Fukuda,<sup>\*d</sup> Takao Someya,<sup>\*d,e</sup> and Shinjiro Umezu,<sup>\*a</sup>

a. Department of Modern Mechanical Engineering, Waseda University, 3-4-1 Okubo, Shinjuku-ku, Tokyo 169-8555, Japan.

b. Institute of Advanced Biomedical Engineering and Science, Tokyo Women's Medical University, 8-1 Kawada-Cho, Shinjuku-Ku, Tokyo 162-8666, Japan.

c. Department of Integrative Bioscience and Biomedical Engineering, TWIns, Waseda University, 2-2 Wakamatsu-cho, Shinjuku-ku, Tokyo 162-8480, Japan

d. Thin-Film Device Laboratory & Center for Emergent Matter Science, RIKEN, 2-1, Hirosawa, Wako, Saitama 351-0198, Japan.

e. Electrical and Electronic Engineering and Information Systems, The University of Tokyo, 7-3-1 Hongo, Bunkyo-ku, Tokyo 113-8656, Japan.

\* All correspondence should be sent to [umeshin@waseda.jp](mailto:umeshin@waseda.jp)

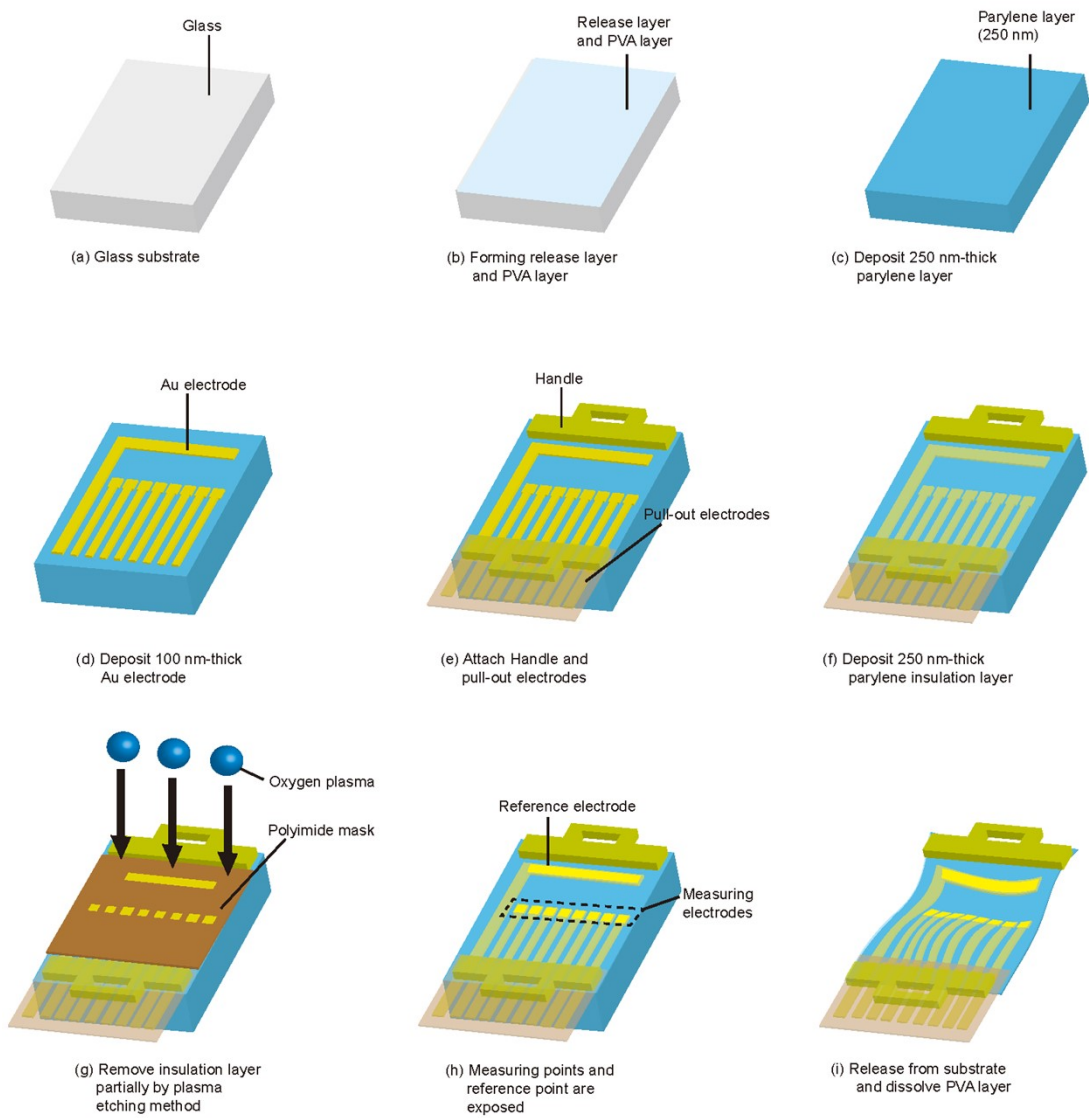

**Fig.S1** Fabrication process of flexible electronic sheet for simultaneous measurement of contractile force and extracellular field potential.

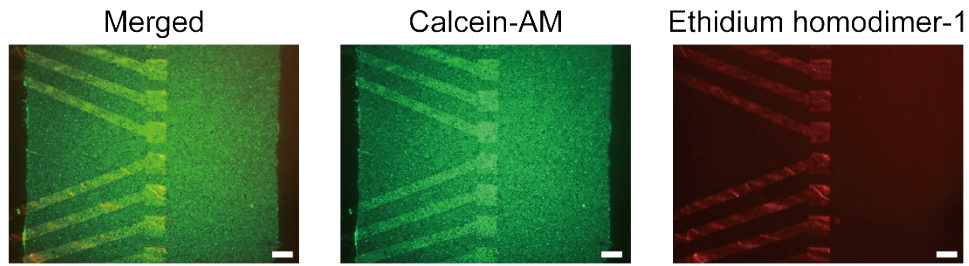

**Fig.S2** Viability of cardiac cell sheet tissue on flexible electronics after peeling from glass substrate. The viability of the cardiac cell sheet tissue was demonstrated by Live-dead staining with calcein-AM (green) specific for live cells and ethidium homodimer-1 (red) specific for dead cells. Note that gold electrode has red auto fluorescence. (Scale bar, 10 mm).

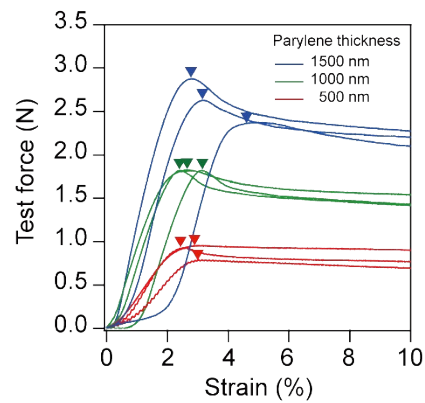

**Fig.S3** Tensile test results for each thickness of thin film. Force-strain curves for each film thickness are shown. Arrows indicate the break of thin films.

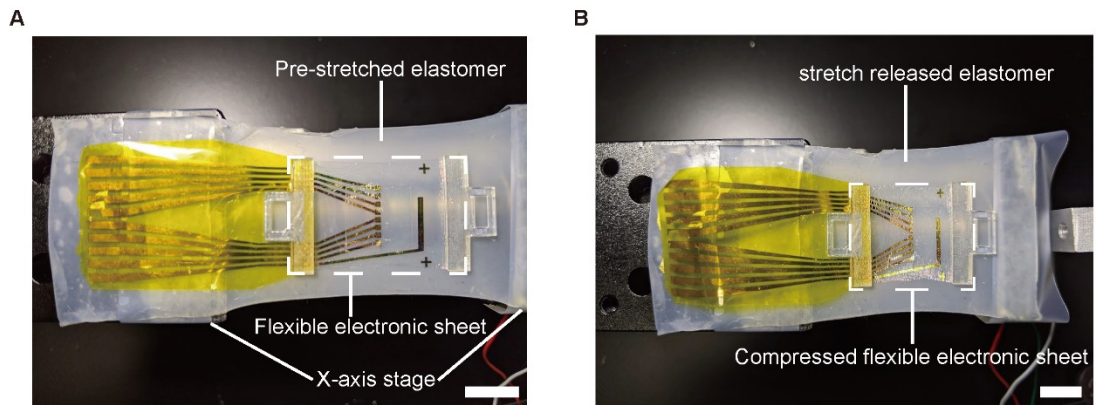

**Fig.S4** Method for generating 20 % compressive strain on flexible electronic sheet by pre-stretched elastomer. **A**, flexible electronic sheet on pre-stretched elastomer. **B**, 20% compressed flexible electronic sheet by releasing pre-stretch of elastomer. (scale bar, 10 mm)

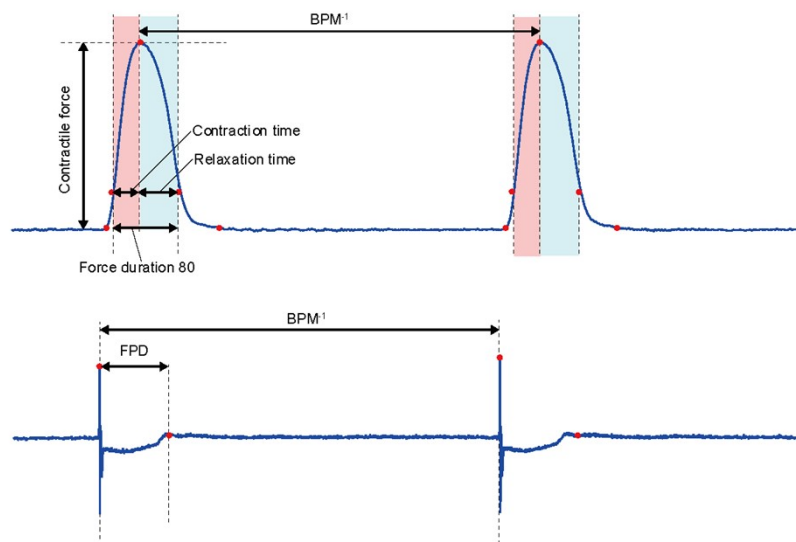

**Fig.S5** Analysis parameters of contractile force and extracellular field potential.

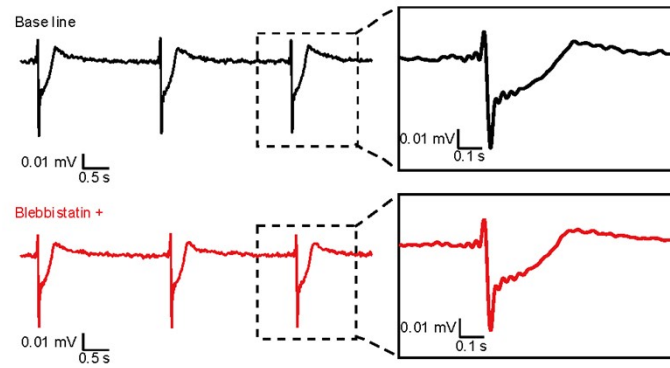

**Fig.S6** Expanded view of change in field potential before and after administering blebbistatin.

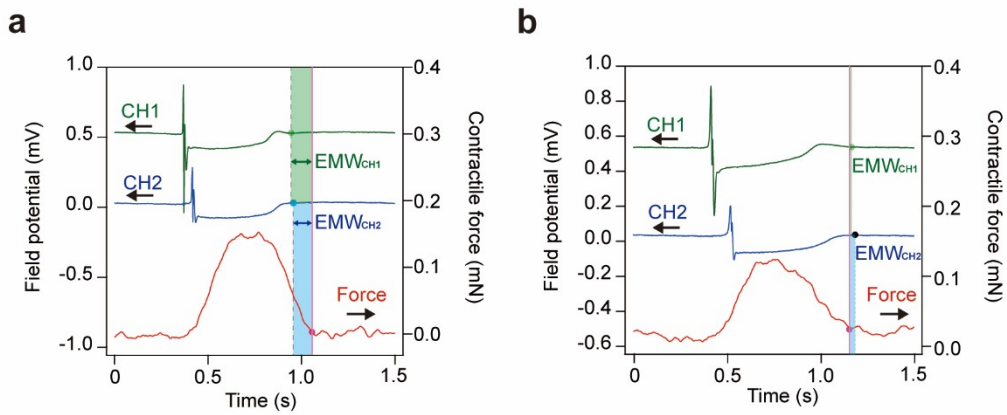

**Fig. S7** Illustration of the difference in EMW due to the choice of the extracellular field potential. **a**, before administering E-4031. **b**, after administering E-4031.  $EMW_{CH1}$  was analyzed using extracellular field potential 1 (CH1).  $EMW_{CH2}$  was analyzed using extracellular field potential 2 (CH2)

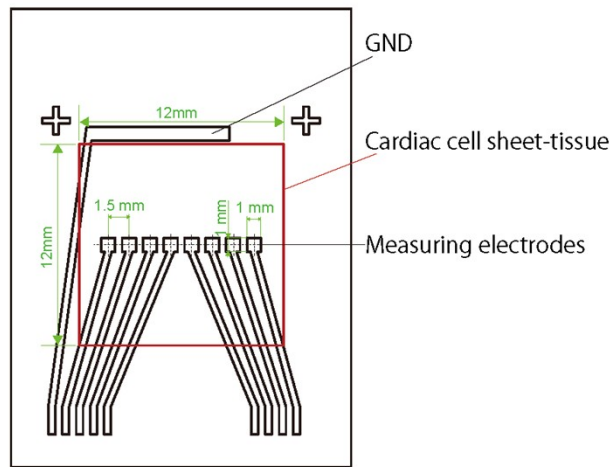

**Fig.S8** Detail electrodes size of flexible electronics.

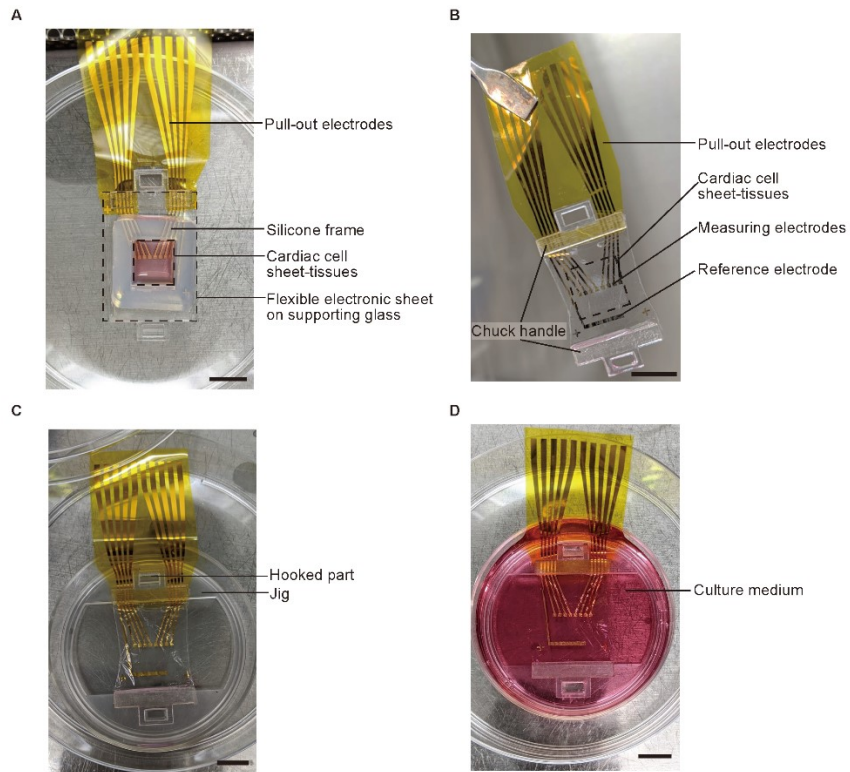

**Fig.S9** Culture of cardiac cell sheet-tissues formed on flexible electronics. **A**, Forming the cardiac cell sheet tissues inside the silicone frame. **B**, after peeled off from supporting glass. **C**, fixing handles to the jig. **D**, culturing the cardiac cell sheet-tissues with maintaining the natural length of flexible electronics sheet.(scale bar: 10 mm)

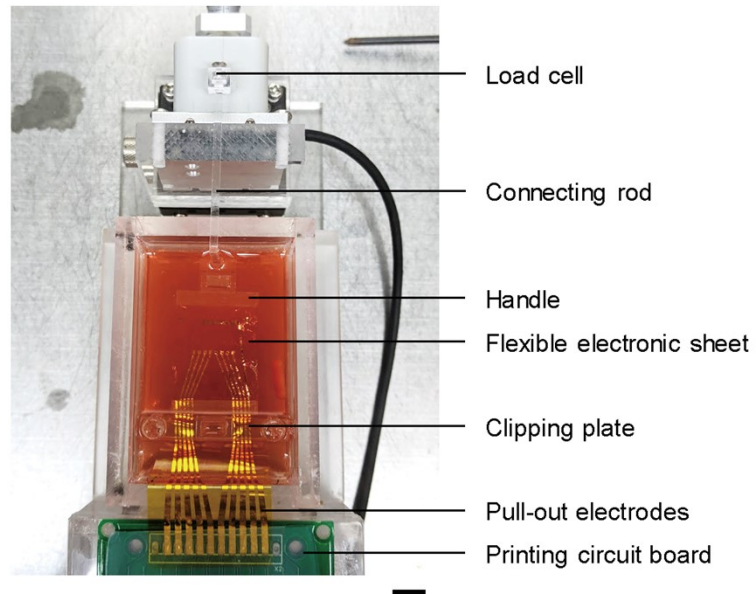

**Fig.S10** Installing the measuring samples to simultaneous measurement system.  
(scale bar, 10 mm)

**Table S1** Comparison of EMW calculation results due to differences in the choice of extracellular potential waveform

| Parameter        | Before   | E-4031(+) |
|------------------|----------|-----------|
| Mean $EMW_{CH1}$ | 127.5 ms | 8.6 ms    |
| Mean $EMW_{CH2}$ | 113.6 ms | 6.5 ms    |
